# Supplementary material for: Potent Activity of a High Concentration of Chemical Ozone against Antibiotic-Resistant Bacteria
Source: MDPI journal article supplement (doi:10.3390/molecules27133998), 2022-06-22
Supplement: s1 [file s1]

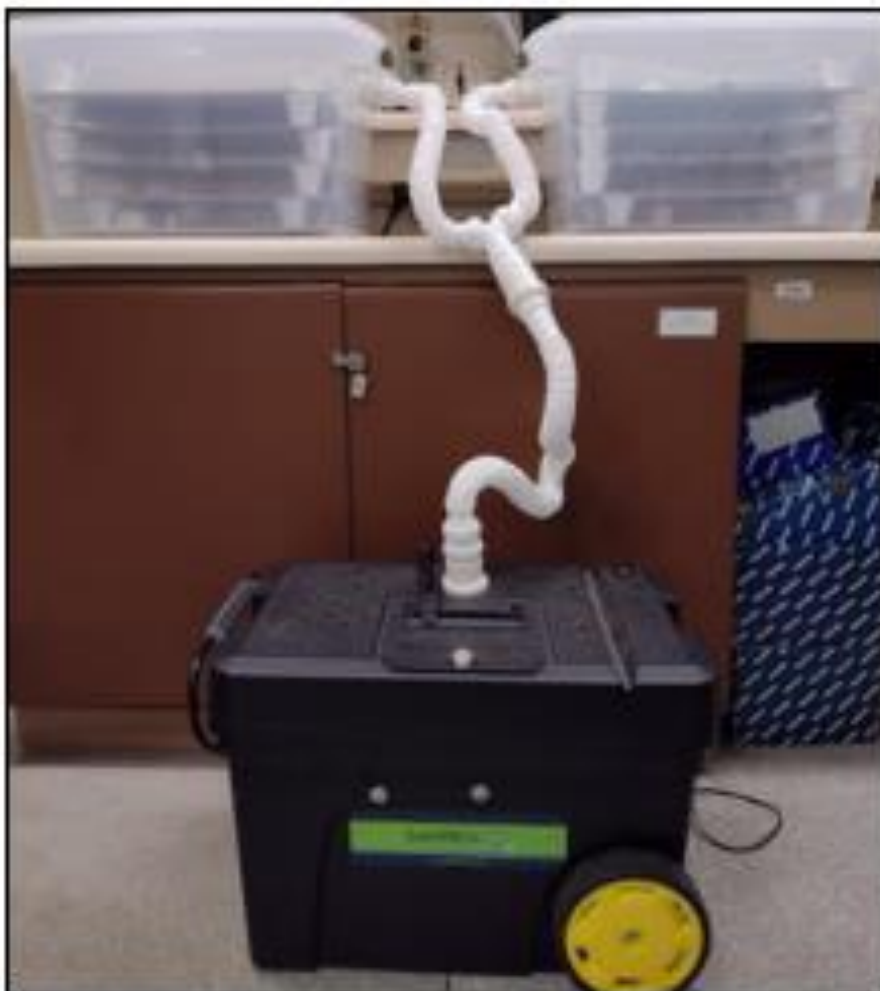

Figure S1: SANITECH O3-80-Sanitization equipment ozone generator coupled to two containers of approximately 1 m<sup>3</sup> each, used for exposing samples to ozone.
